# Supplementary material for: The efficacy of re-challenge with BRAF inhibitors after previous progression to BRAF inhibitors in melanoma: A retrospective multicenter study
Source: PubMed Central journal article supplement (PMC6188134; doi:10.18632/oncotarget.26149), 2018-09-28
Supplement: oncotarget-09-34336-s001.pdf [file oncotarget-09-34336-s001.pdf]

## The efficacy of re-challenge with BRAF inhibitors after previous progression to BRAF inhibitors in melanoma: A retrospective multicenter study

### SUPPLEMENTARY MATERIALS

Supplementary Table 1: Response to BRAF2 significantly correlated to the degree of response to BRAF1

|                   |    | CR |     | PR |     | SD |     | MR |      | PD |     |
|-------------------|----|----|-----|----|-----|----|-----|----|------|----|-----|
| Response to BRAF1 |    | 7  | 12% | 35 | 58% | 12 | 20% | 2  | 3%   | 4  | 7%  |
| Response to BRAF2 | CR | 4  | 57% | 1  | 3%  | 0  | 0%  | 0  | 0    | 0  | 0%  |
|                   | PR | 1  | 14% | 9  | 26% | 2  | 17% | 0  | 0    | 0  | 0%  |
|                   | SD | 2  | 29% | 11 | 31% | 4  | 33% | 0  | 0    | 0  | 0%  |
|                   | MR | 0  | 0%  | 5  | 14% | 1  | 8%  | 2  | 100% | 1  | 25% |
|                   | PD | 0  | 0%  | 9  | 26% | 5  | 42% | 0  | 0    | 3  | 75% |
